# Supplementary material for: Fenofibrate Inhibited the Differentiation of T Helper 17 CellsIn Vitro
Source: Hindawi journal article supplement (doi:10.1155/2012/145654), 2012-01-01

**Supplemental Figure 1. Fenofibrate, bezafibrate, WY14643 and GW7647 activated PPAR $\alpha$  .**

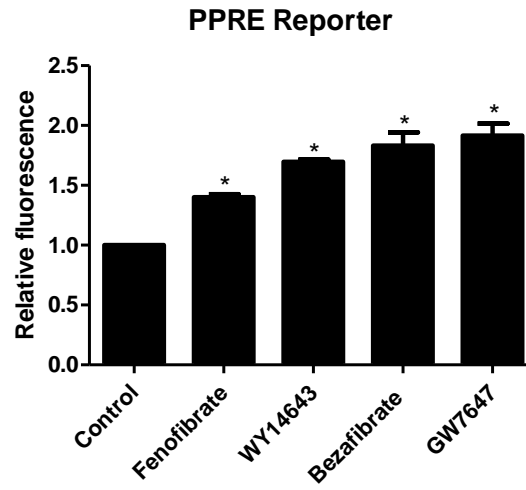

**Supplemental Figure 2. Fenofibrate, WY14643, bezafibrate and GW7647 did not influence T cell viability.**

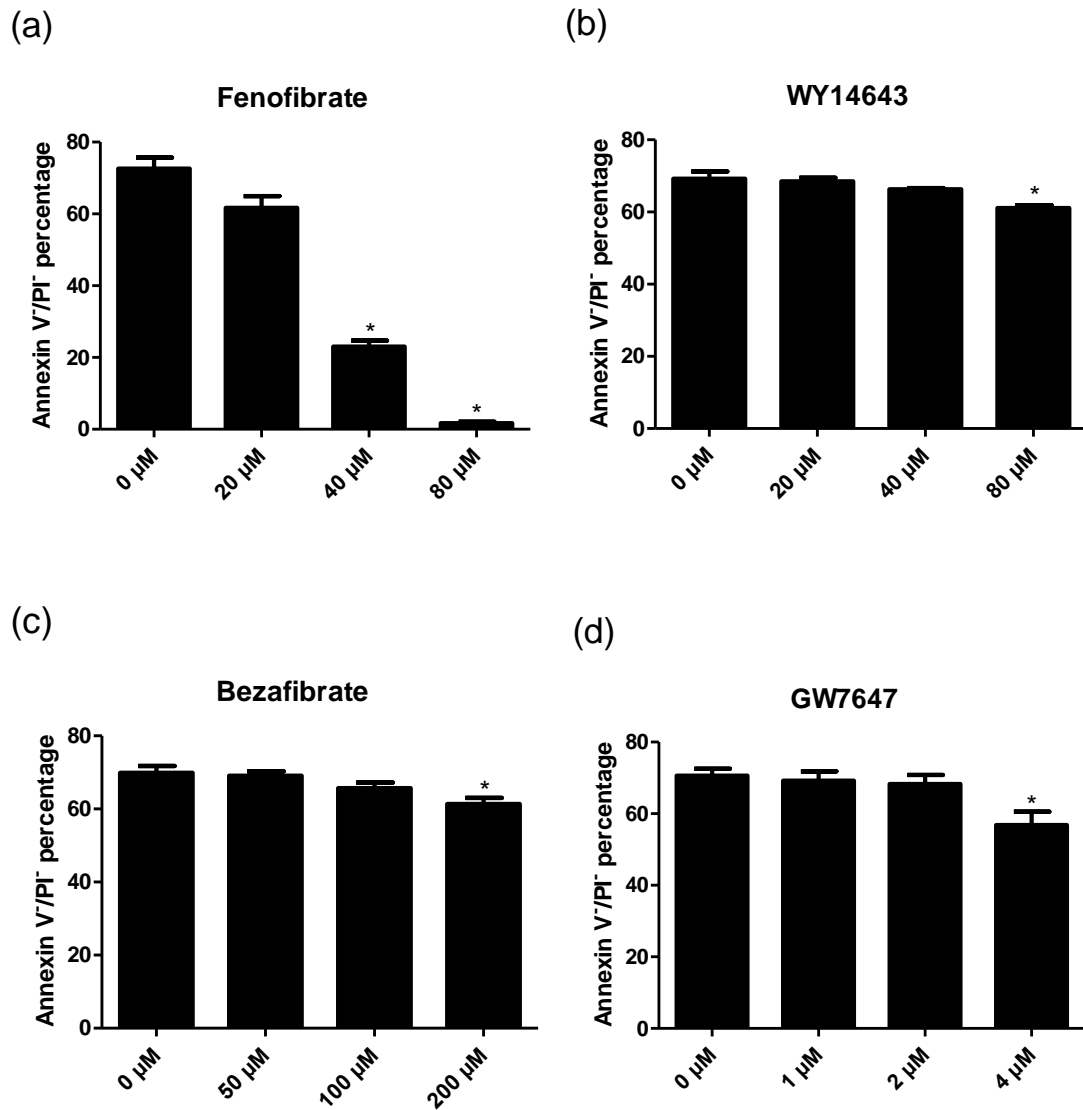

**Supplemental Figure 3. Fenofibrate, WY14643, bezafibrate and GW7647 did not influence T cell proliferation.**

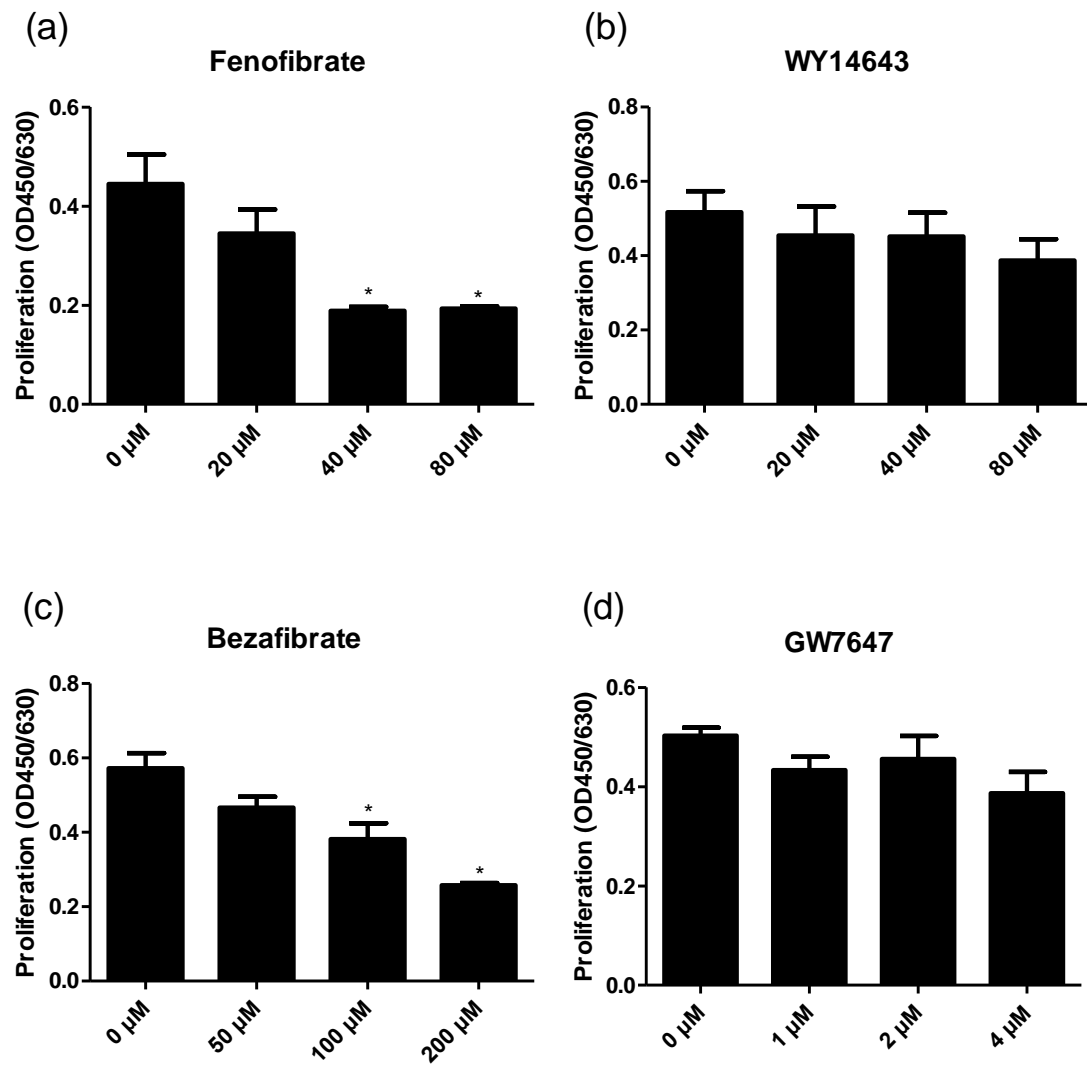

**Supplemental Figure 4. Fenofibrate did not affect the protein level of other members of IL-6 signal.**

(a)

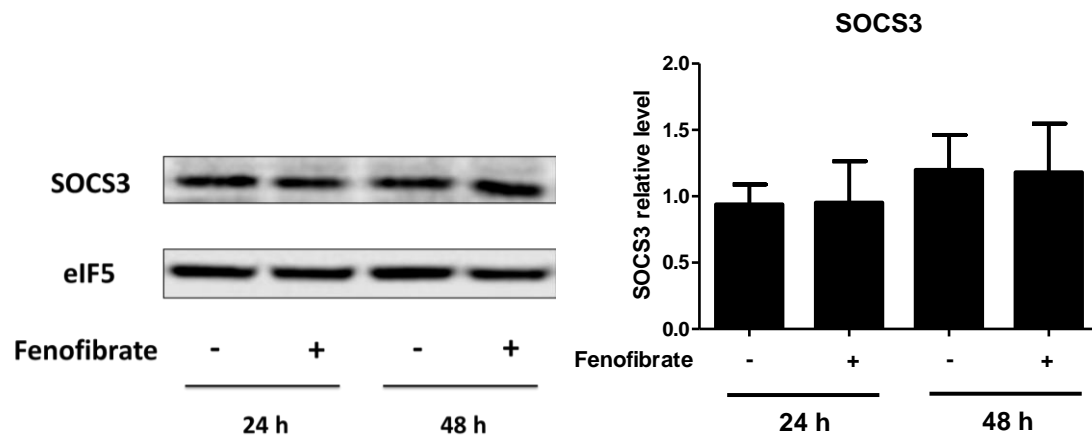

(b)

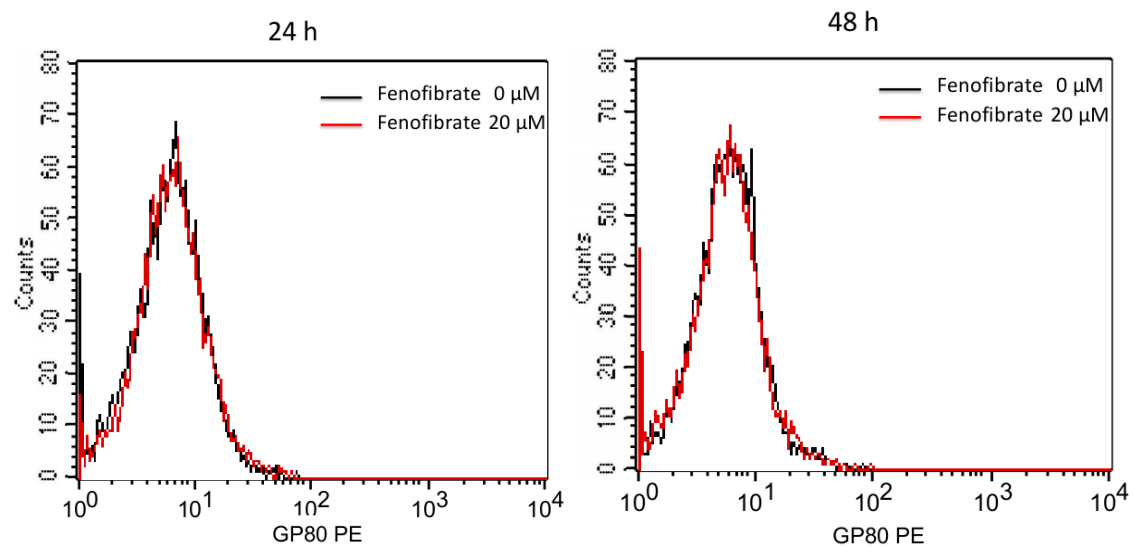

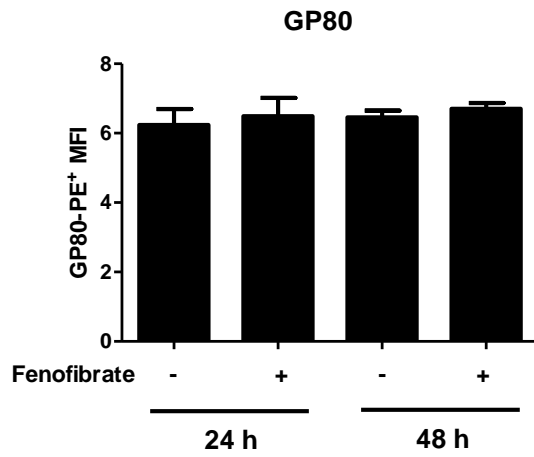

(c)

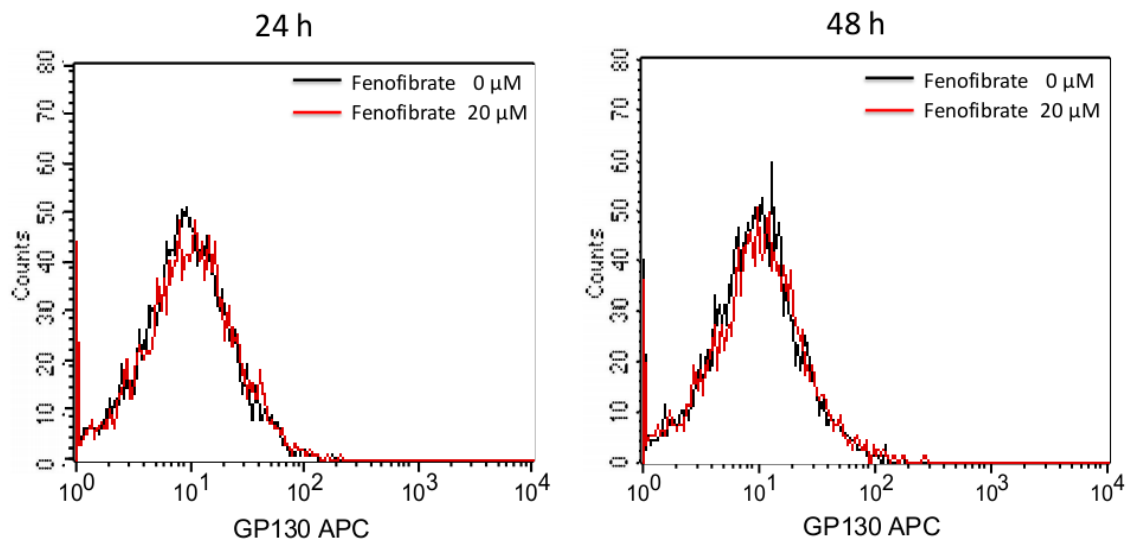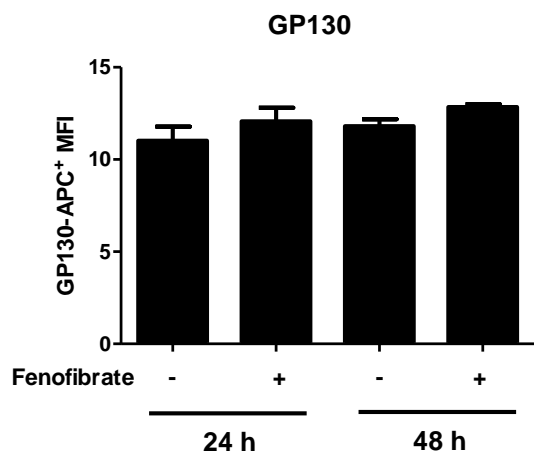

(d)

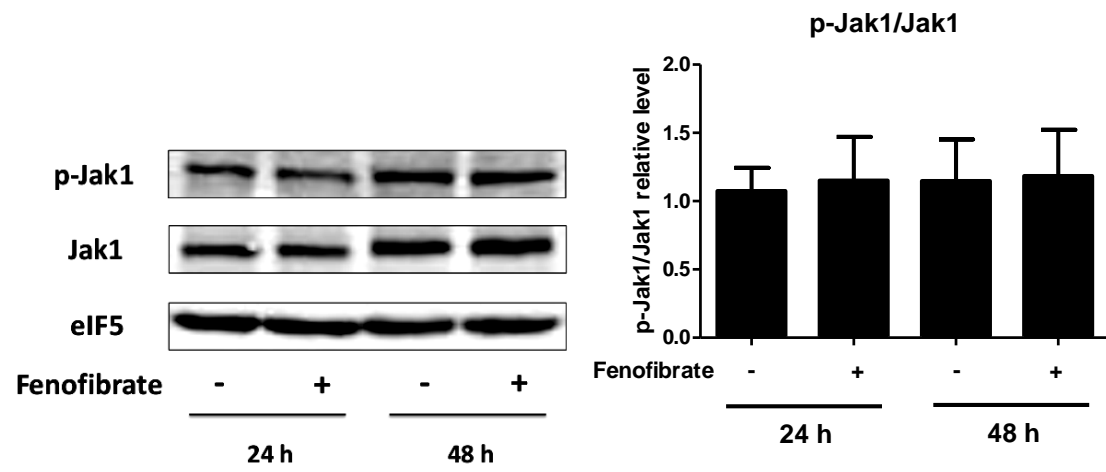

(e)

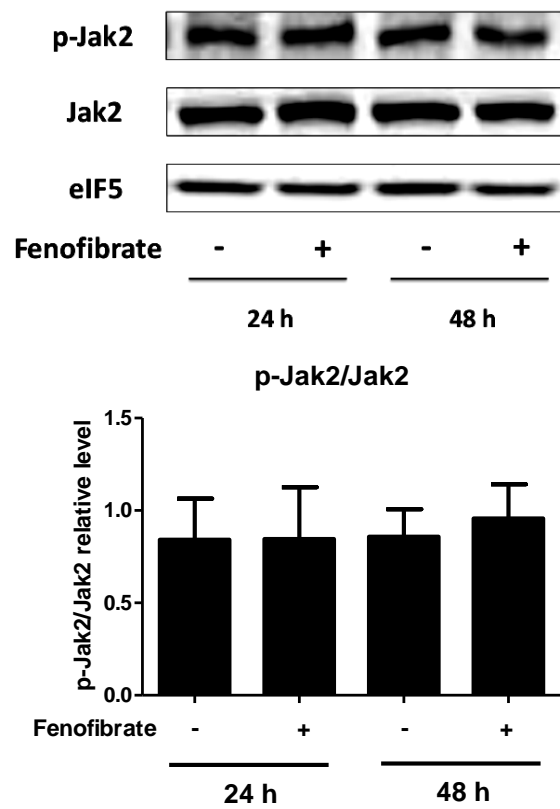

Supplement: f1 [file 145654.f1.pdf]
